# Supplementary material
Source: PubMed Central journal article supplement (PMC4744567)
Supplement: NIHMS744734-supplement-1.pdf [file NIHMS744734-supplement-1.pdf]

**Fig. S1**

**A** *CD11c-cre Irf4* mice

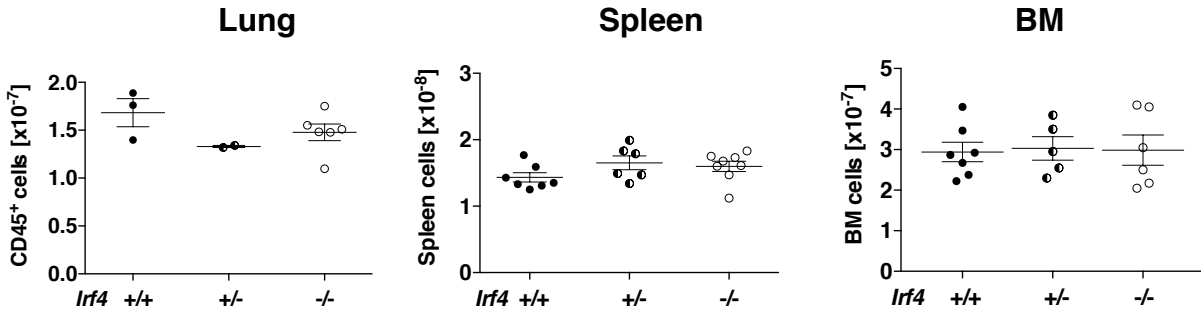

**B** *CD11c-cre Irf8* mice

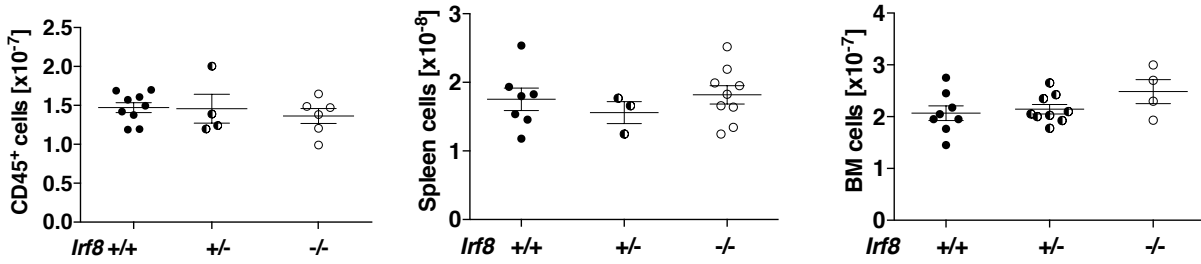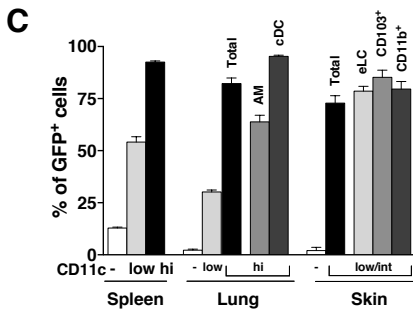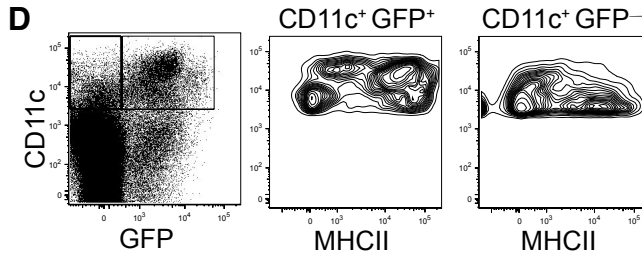

**Fig. S1. Total numbers of cells in the lungs, spleen and BM of *CD11c-cre-Irf4* and *CD11c-cre-Irf8* +/+, +/- and -/- mice. (A) The total numbers of lung CD45<sup>+</sup> cells (n=3-6), splenocytes (n=6-8) and bone marrow cells (n=5-7) in multiple *CD11c-cre-Irf4* +/+, +/- and -/- mice are compiled. (B) The total numbers of lung CD45<sup>+</sup> cells (n=4-9), splenocytes (n=5-6) and bone marrow cells (n=4-9) in multiple *CD11c-cre-Irf8* +/+, +/- and -/- mice are compiled. (C) To illustrate the penetrance of the *Irf4* deletion in *CD11c-cre-Irf4* -/- mice, shown is the percentage of GFP<sup>+</sup> cells within the CD11c<sup>-</sup>, CD11c<sup>low</sup> and CD11c<sup>hi</sup> fractions of the spleen, lung and skin. Within the lung CD11c<sup>hi</sup> fraction, the percentage of GFP<sup>+</sup> alveolar macrophages (AM) and cDCs is also reported. Within the skin CD11c<sup>low/int</sup> fraction, the percentage of GFP<sup>+</sup> epidermal Langerhans cells (eLCs), dermal CD103<sup>+</sup> DCs and CD11b<sup>+</sup> dermal DCs is also reported. (D) Shown is the expression of CD11c and GFP in the lung of *CD11c-cre-Irf4* +/- mice. (E) Shown is the expression of MHCII and GFP in the dermis of *CD11c-cre-Irf4* -/- mice**

**Fig. S2**

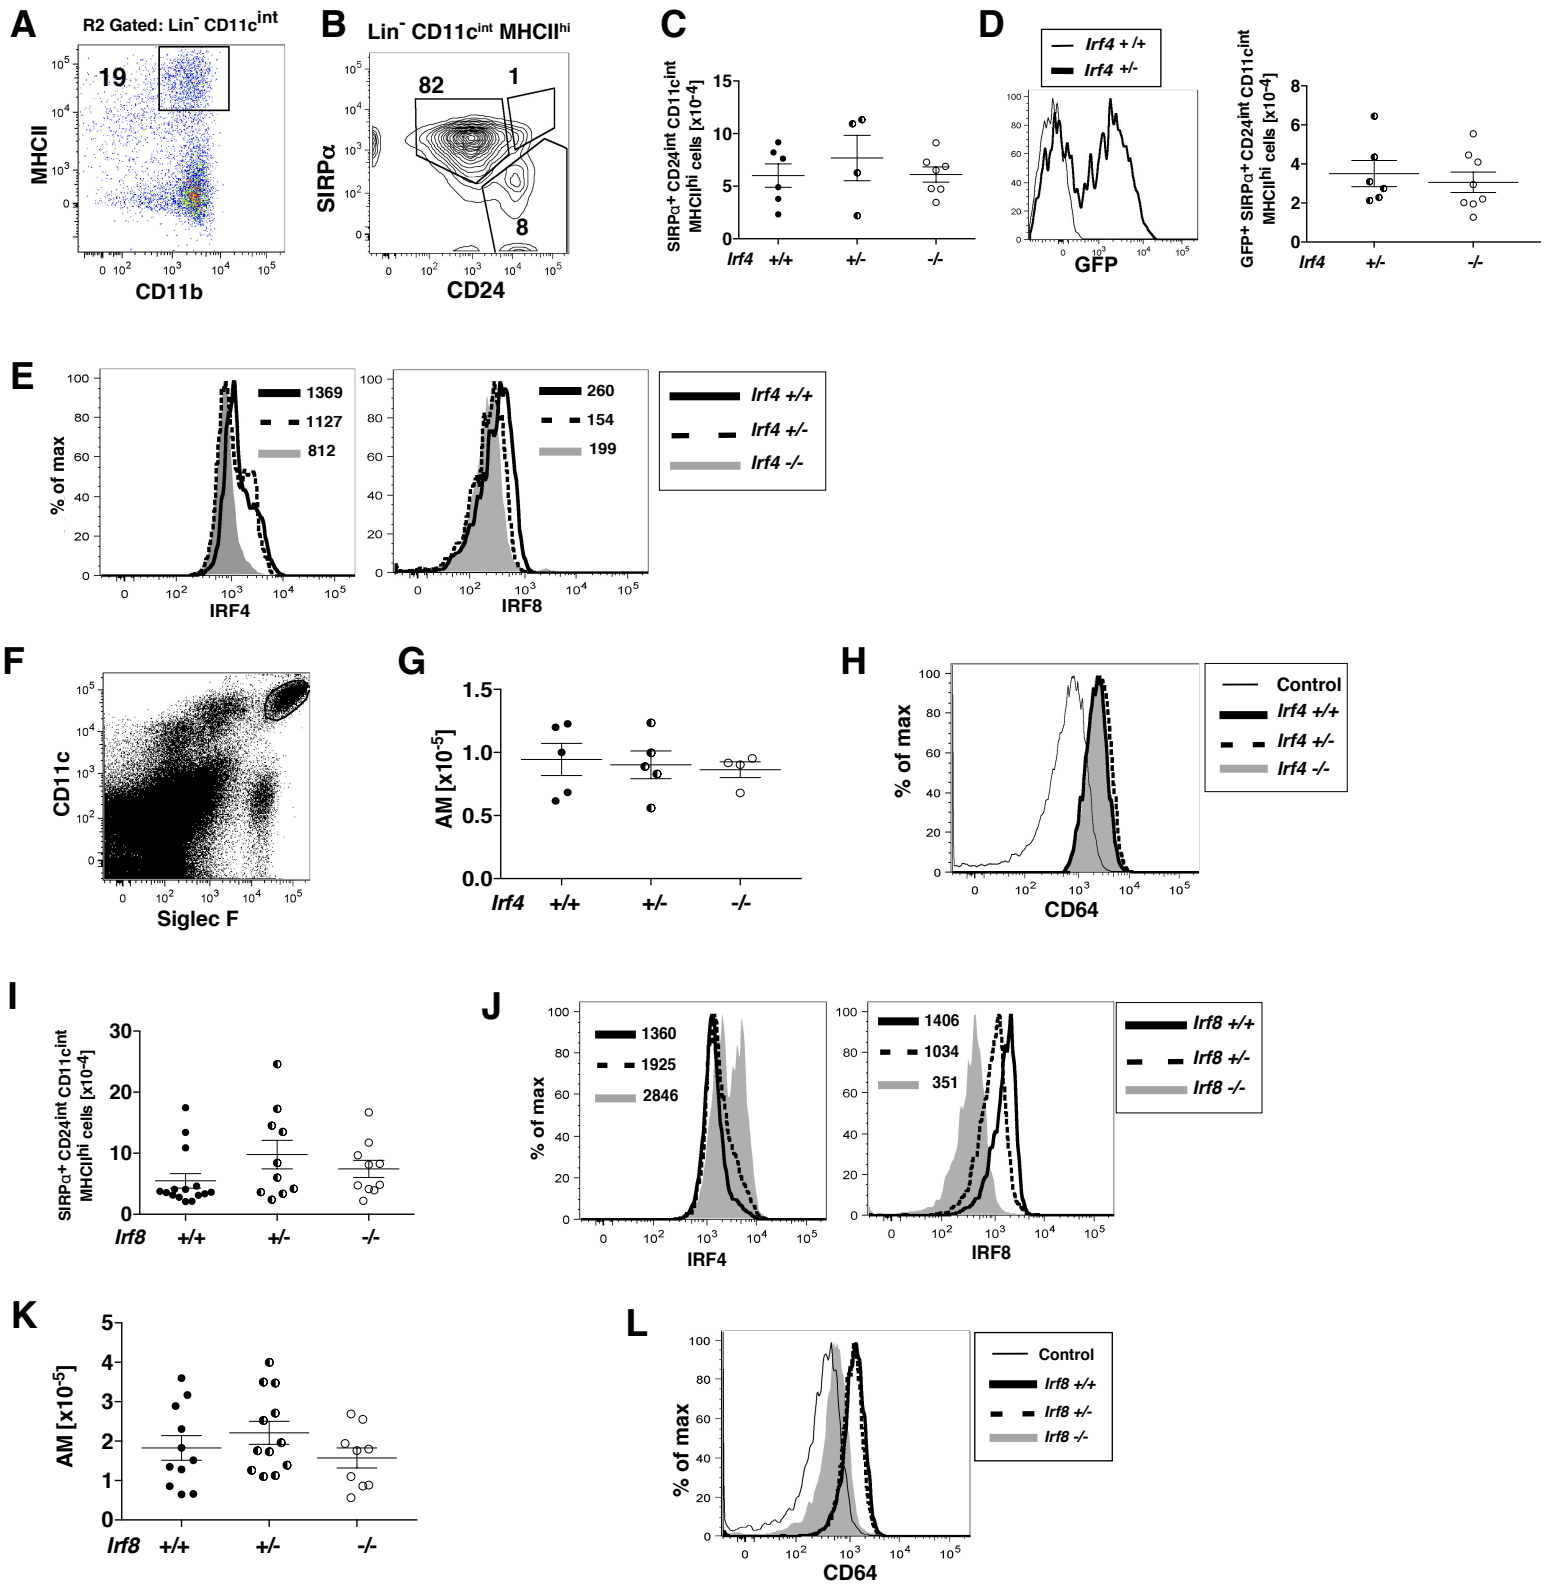

**Fig. S2. Multiple DC and macrophage populations are not affected by *Irf4* or *Irf8* deficiency in CD11c<sup>+</sup> cells.** (A-H) Data are from *CD11c-cre-Irf4* *+/+*, *+/-* and *-/-* mice. (A) In the lungs of *CD11c-cre-Irf4* *+/+* mice, definition of CD11b<sup>+</sup>MHCII<sup>hi</sup> cells in the CD11c<sup>int</sup>SiglecF<sup>-</sup> R2 gate (shown in Fig. 1A). (B) DCs are SIRPα<sup>+</sup>CD24<sup>int</sup> (in P2 gate). Shown are the gates for the P1, P2 and P3 subsets of CD11c<sup>hi</sup> cDCs in gate R1. (C) Total numbers of CD11c<sup>int</sup>MHCII<sup>hi</sup>CD11b<sup>+</sup>CD24<sup>int</sup> cells in the lungs of *CD11c-cre-Irf4* *+/+*, *+/-* and *-/-* mice, n=4-6. (D) Only a subset of CD11c<sup>int</sup>MHCII<sup>hi</sup> DCs (gated in panel A) is GFP<sup>+</sup> in *+/-* mice. Numbers of GFP<sup>+</sup>CD11c<sup>int</sup>MHCII<sup>hi</sup> DCs in multiple *+/-* and *-/-* mice are compiled (n=6-7). (E) IRF4 and IRF8 protein levels were determined in *+/+*, *+/-* and *-/-* CD11c<sup>int</sup>MHCII<sup>hi</sup>CD11b<sup>+</sup>CD24<sup>int</sup> DCs by intracellular staining. The MFI of each histogram is indicated. (F) Definition of CD11c<sup>hi</sup>SiglecF<sup>hi</sup> alveolar macrophages in the lungs of *+/+* mice. (G) Numbers of alveolar macrophages in the lungs are compiled from multiple *+/+*, *+/-* and *-/-* mice, n= 4-5. (H) The expression of CD64 on alveolar macrophages in *+/+*, *+/-* and *-/-* mice is shown relative to an isotype control. (I-L) Data are from *CD11c-cre-Irf8* *+/+*, *+/-* and *-/-* mice. (I) Total numbers of CD11c<sup>int</sup>MHCII<sup>hi</sup>CD11b<sup>+</sup>CD24<sup>int</sup> cells in the lungs of *CD11c-cre-Irf8* *+/+*, *+/-* and *-/-* mice, n=10-15. (J) IRF4 and IRF8 protein levels were determined in *+/+*, *+/-* and *-/-* CD11c<sup>int</sup>MHCII<sup>hi</sup>CD11b<sup>+</sup>CD24<sup>int</sup> DCs by intracellular staining. The MFI of each histogram is indicated. (K) Numbers of alveolar macrophages in the lungs are compiled from multiple *+/+*, *+/-* and *-/-* mice, n= 9-11. (L) The expression of CD64 on alveolar macrophages in *+/+*, *+/-* and *-/-* mice is shown. The data were evaluated using a one-way ANOVA (panels C, G, I and K) or an unpaired t test (panel D); no significant differences between genotypes were identified.
